# Supplementary material for: Glycomacropeptide-Based Protein Substitutes for Children with Phenylketonuria in Italy: A Nutritional Comparison
Source: MDPI journal article supplement (doi:10.3390/nu16070956), 2024-03-27
Supplement: s1 [file s1]

**Table S1.** Food components contained in 100 g of GMP-based protein substitute – powdered. If nutritional data was not present nutritional label, the term “Not Declared” (ND) was used.

| Content per 100 g | Unit | MEDIFOOD   |            | NUTRICIA   | MAMOXI     |            |            | MEVALIA    |            | VITAFLO    |             |
|-------------------|------|------------|------------|------------|------------|------------|------------|------------|------------|------------|-------------|
|                   |      | powdered 1 | powdered 2 | powdered 3 | powdered 4 | powdered 5 | powdered 6 | powdered 7 | powdered 8 | powdered 9 | powdered 10 |
| Energy            | Kj   | 1342       | 1336       | 1616       | 1257       | 1257       | 1257       | 1352       | 1338       | 1432       | 1432        |
| Energy            | Kcal | 318        | 316        | 384        | 298        | 298        | 298        | 319        | 320        | 338        | 338         |

| Content per 100 g | Unit | CAMBROOKE   |             |             |             |             |             |             |             |             |             |             |
|-------------------|------|-------------|-------------|-------------|-------------|-------------|-------------|-------------|-------------|-------------|-------------|-------------|
|                   |      | powdered 11 | powdered 12 | powdered 13 | powdered 14 | powdered 15 | powdered 16 | powdered 17 | powdered 18 | powdered 19 | powdered 20 | powdered 21 |
| Energy            | Kj   | 1675        | 1674        | 1674        | 1400        | 1400        | 1439        | 1485        | 1395        | 1475        | 1527        | 1527        |
| Energy            | Kcal | 400         | 385         | 400         | 335         | 335         | 344         | 355         | 333         | 353         | 365         | 365         |

| Content per 100 g           | Unit | MEDIFOOD   |            | NUTRICIA   | MAMOXI     |            |            | MEVALIA    |            | VITAFLO    |             |
|-----------------------------|------|------------|------------|------------|------------|------------|------------|------------|------------|------------|-------------|
|                             |      | powdered 1 | powdered 2 | powdered 3 | powdered 4 | powdered 5 | powdered 6 | powdered 7 | powdered 8 | powdered 9 | powdered 10 |
| Total fats                  | g    | 0.20       | 0.20       | 11.70      | 2.00       | 2.00       | 2.00       | 1.70       | 1.50       | 4.70       | 4.70        |
| Saturated fatty acids       | g    | 0.10       | 0.10       | 2.80       | 1.00       | 1.00       | 1.00       | 0.70       | 0.40       | 1.00       | 1.00        |
| Monounsaturated fatty acids | g    | ND         | ND         | 6.40       | 0.80       | 0.80       | 0.80       | ND         | ND         | 0.50       | 0.50        |
| Polyunsaturated fatty acids | g    | ND         | ND         | 2.50       | 0.30       | 0.30       | 0.30       | ND         | ND         | 1.20       | 1.20        |
| Docosahexaenoic acid (DHA)  | mg   | ND         | ND         | 155.00     | ND         | ND         | ND         | 290.00     | 278.00     | 314.00     | 314.00      |
| Eicosapentaenoic acid       | mg   | ND         | ND         | 5.00       | ND         | ND         | ND         | 64.00      | 62.00      | ND         | ND          |
| Carbohydrates               | g    | 39.10      | 38.80      | 37.50      | 8.00       | 8.00       | 8.00       | 32.00      | 33.00      | 18.00      | 18.00       |

|                            |   |       |       |       |       |       |       |       |       |               |       |
|----------------------------|---|-------|-------|-------|-------|-------|-------|-------|-------|---------------|-------|
| Sugars                     | g | 2.40  | 2.40  | 26.00 | 0.80  | 0.80  | 0.80  | 19.00 | 22.00 | 6.30 (8.00\$) | 6.30  |
| Maltose                    | g | ND    | ND    | 2.00  | ND    | ND    | ND    | ND    | ND    | ND            | ND    |
| Sucrose                    | g | ND    | ND    | 24.00 | ND    | ND    | ND    | ND    | ND    | ND            | ND    |
| Fiber                      | g | ND    | ND    | 4.50  | 14.00 | 14.00 | 14.00 | 3.00  | 3.00  | ND            | ND    |
| Protein<br>equival<br>ents | g | 40.00 | 40.00 | 30.00 | 55.00 | 55.00 | 55.00 | 43.00 | 41.00 | 56.00         | 56.00 |

| Content<br>per 100<br>g                | Unit | CAMBROOKE      |             |             |             |             |             |             |             |             |             |             |
|----------------------------------------|------|----------------|-------------|-------------|-------------|-------------|-------------|-------------|-------------|-------------|-------------|-------------|
|                                        |      | powdered<br>11 | powdered 12 | powdered 13 | powdered 14 | powdered 15 | powdered 16 | powdered 17 | powdered 18 | powdered 19 | powdered 20 | powdered 21 |
| Total<br>fats                          | g    | 11.00          | 11.50       | 11.00       | 4.20        | 4.20        | 6.30        | 6.50        | 6.10        | 6.40        | 0           | 0           |
| Saturate<br>d fatty<br>acids           | g    | 4.60           | 4.50        | 4.50        | 0.70        | 0.70        | 0.80        | 0.70        | 0.60        | 0.70        | 0           | 0           |
| Monou<br>nsaturat<br>ed fatty<br>acids | g    | 2.40           | 2.30        | 2.30        | ND          | ND          | 3.20        | 2.70        | 3.80        | 2.80        | ND          | ND          |
| Polyuns<br>aturate<br>d fatty<br>acids | g    | 4.20           | 4.00        | 4.00        | ND          | ND          | 1.50        | 1.50        | 1.50        | 1.50        | ND          | ND          |
| Decosa<br>hexaeno<br>ic acid<br>(DHA)  | mg   | 192.00         | 62.0        | 62.00       | 167.00      | 167.00      | 156.00      | 161.00      | 152.00      | 160.00      | ND          | ND          |
| Eicosap<br>entaeno<br>ic acid          | mg   | ND             | ND          | ND          | ND          | ND          | ND          | ND          | ND          | ND          | ND          | ND          |
| Carboh<br>ydrates                      | g    | 37.00          | 50.00       | 50.00       | 2.40        | 2.40        | 5.20        | 5.50        | 5.50        | 5.40        | 68.00       | 68.00       |
| Sugars                                 | g    | 12.00          | 13.00       | 13.00       | 0.80        | 0.80        | 0.60        | 0.80        | 0.80        | 0.60        | 65.00       | 65.00       |
| Maltose                                | g    | ND             | ND          | ND          | ND          | ND          | ND          | ND          | ND          | ND          | ND          | ND          |
| Sucrose                                | g    | ND             | ND          | ND          | ND          | ND          | ND          | ND          | ND          | ND          | ND          | ND          |
| Fiber                                  | g    | 0              | 0.10        | 0           | 0           | 0           | 1           | 1.00        | 1.00        | 1.00        | 0           | 0           |

|                            |   |       |       |       |       |       |       |       |       |       |       |       |
|----------------------------|---|-------|-------|-------|-------|-------|-------|-------|-------|-------|-------|-------|
| Protein<br>equival<br>ents | g | 38.00 | 38.00 | 38.00 | 67.00 | 67.00 | 63.00 | 64.00 | 64.00 | 64.00 | 25.00 | 25.00 |
|----------------------------|---|-------|-------|-------|-------|-------|-------|-------|-------|-------|-------|-------|

| Content<br>per 100 g | Unit | MEDIFOOD   |            | NUTRICIA   | MAMOXI     |            |            | MEVALIA                       |                               | VITAFLO    |             |
|----------------------|------|------------|------------|------------|------------|------------|------------|-------------------------------|-------------------------------|------------|-------------|
|                      |      | powdered 1 | powdered 2 | powdered 3 | powdered 4 | powdered 5 | powdered 6 | powdered 7                    | powdered 8                    | powdered 9 | powdered 10 |
| L-Alanine            | g    | 1.82       | 1.82       | 1.20       | 5.80       | 5.80       | 5.80       | 2.76                          | 2.65                          | 2.36       | 2.23        |
| L-Arginine           | g    | 2.17       | 2.17       | 1.50       | 2.00       | 2.00       | 2.00       | 2.02                          | 1.89                          | 2.73       | 2.71        |
| L-Aspartic acid      | g    | 2.65       | 2.65       | 1.80       | 5.40       | 5.40       | 5.40       | 4.80                          | 4.45                          | 3.73       | 3.2         |
| L-Cystine            | mg   | 25.23      | 25.23      | 870.00     | 30.00      | 30.00      | 30.00      | 250                           | 0.21                          | 0.00       | 0.00        |
| L-Glutamic acid      | g    | 5.98       | 5.98       | 4.00       | 6.00       | 6.00       | 6.00       | 4.17<br>(L-glutamine<br>2.76) | 3.74<br>(L-glutamine<br>2.65) | 7.72       | 7.34        |
| Glycine              | g    | 0.33       | 0.33       | 0.20       | 8.40       | 8.40       | 8.40       | 3.36                          | 3.24                          | 2.02       | 3.43        |
| L-Histidine          | g    | 1.63       | 1.63       | 1.20       | 1.20       | 1.20       | 1.20       | 1.28                          | 1.22                          | 2.01       | 2.00        |
| L-Isoleucine         | g    | 3.05       | 3.05       | 2.20       | 3.30       | 3.30       | 3.30       | 1.84                          | 1.83                          | 4.06       | 3.86        |
| L-Leucine            | g    | 5.17       | 5.17       | 4.50       | 5.00       | 5.00       | 5.00       | 2.65                          | 2.56                          | 8.63       | 8.57        |
| L-Lysine             | g    | 3.11       | 3.11       | 1.30       | 3.10       | 3.10       | 3.10       | 3.47                          | 3.24                          | 2.72       | 2.29        |
| L-Methionine         | g    | 0.56       | 0.56       | 0.40       | 0.60       | 0.60       | 0.60       | 0.79                          | 0.80                          | 0.80       | 0.80        |
| L-Phenylalanine      | mg   | 50.46      | 50.46      | 54.00      | 91.00      | 91.00      | 91.00      | 61.00                         | 61.00                         | 104.00     | 104.00      |
| L-Proline            | g    | 3.51       | 3.51       | 2.40       | 3.70       | 3.70       | 3.70       | 5.39                          | 5.17                          | 4.58       | 4.34        |
| L-Serine             | g    | 2.27       | 2.27       | 1.50       | 2.40       | 2.40       | 2.40       | 1.42                          | 1.31                          | 2.88       | 2.74        |
| Taurine              | mg   | ND         | ND         | 90.00      | 54.00      | 54.00      | 54.00      | ND                            | ND                            | ND         | ND          |
| L-Threonine          | g    | 5.07       | 5.07       | 3.40       | 5.30       | 5.30       | 5.30       | 4.03                          | 3.87                          | 6.55       | 6.29        |

|              |    |      |      |       |       |       |       |       |       |      |      |
|--------------|----|------|------|-------|-------|-------|-------|-------|-------|------|------|
| L-Tryptophan | g  | 0.86 | 0.86 | 0.72  | 0.90  | 0.90  | 0.90  | 0.77  | 0.71  | 1.15 | 1.14 |
| L-Tyrosine   | g  | 5.73 | 5.73 | 3.00  | 5.80  | 5.80  | 5.80  | 6.63  | 6.31  | 6.43 | 6.4  |
| L-Valine     | g  | 3.25 | 3.25 | 2.60  | 2.70  | 2.70  | 2.70  | 1.48  | 1.47  | 3.27 | 3.11 |
| L-Carnitine  | mg | ND   | ND   | 43.20 | 49.00 | 49.00 | 49.00 | 25.00 | 24.00 | ND   | ND   |

| Content per 100 g | Unit | CAMBROOKE   |             |             |             |             |             |             |             |             |             |             |
|-------------------|------|-------------|-------------|-------------|-------------|-------------|-------------|-------------|-------------|-------------|-------------|-------------|
|                   |      | powdered 11 | powdered 12 | powdered 13 | powdered 14 | powdered 15 | powdered 16 | powdered 17 | powdered 18 | powdered 19 | powdered 20 | powdered 21 |
| L-Alanine         | g    | 0.94        | 0.95        | 0.9         | 2.26        | 2.26        | 2.10        | 2.17        | 2.17        | 2.16        | 1.07        | 1.07        |
| L-Arginine        | g    | 3.12        | 3.12        | 3.12        | 7.06        | 7.06        | 6.56        | 6.77        | 6.77        | 6.73        | 2.61        | 2.61        |
| L-Aspartic acid   | g    | 1.26        | 1.26        | 1.26        | 3.00        | 3.00        | 2.78        | 2.78        | 2.78        | 2.85        | 1.54        | 1.54        |
| L-Cystine         | mg   | 15.00       | 15.00       | 15.0        | 33.00       | 33.00       | 34.00       | 35.00       | 35.00       | 35.00       | 20.00       | 20.00       |
| L-Glutamic acid   | g    | 3.06        | 3.06        | 3.06        | 7.33        | 7.33        | 6.81        | 7.03        | 7.03        | 6.98        | 3.61        | 3.61        |
| Glycine           | g    | 2.00        | 2.00        | 2.00        | 3.06        | 3.06        | 2.84        | 2.93        | 2.93        | 2.91        | 0.19        | 0.19        |
| L-Histidine       | g    | 0.70        | 0.70        | 0.70        | 1.60        | 1.60        | 1.48        | 1.53        | 1.53        | 1.52        | 0.63        | 0.63        |
| L-Isoleucine      | g    | 1.61        | 1.61        | 1.61        | 3.88        | 3.86        | 3.56        | 3.67        | 3.67        | 3.65        | 1.82        | 1.82        |
| L-Leucine         | g    | 3.22        | 3.22        | 3.22        | 7.66        | 7.66        | 7.10        | 7.33        | 7.33        | 7.29        | 5.29        | 5.29        |
| L-Lysine          | g    | 2.73        | 2.73        | 2.73        | 4.00        | 4.00        | 3.71        | 3.83        | 3.83        | 3.81        | 1.09        | 1.09        |
| L-Methionine      | g    | 0.36        | 0.37        | 0.37        | 0.67        | 0.67        | 0.61        | 0.63        | 0.63        | 0.62        | 0.28        | 0.28        |
| L-Phenylalanine   | mg   | 38.00       | 31.00       | 31.00       | 67.00       | 67.00       | 62.00       | 65.00       | 65.00       | 64.00       | 45.00       | 45.00       |
| L-Proline         | g    | 1.77        | 1.77        | 1.77        | 4.26        | 4.26        | 3.93        | 4.06        | 4.06        | 4.03        | 2.03        | 2.03        |
| L-Serine          | g    | 1.00        | 1.00        | 1.00        | 2.40        | 2.40        | 2.21        | 2.29        | 2.29        | 2.27        | 1.15        | 1.15        |

|              |    |        |        |        |      |      |      |      |      |      |      |      |
|--------------|----|--------|--------|--------|------|------|------|------|------|------|------|------|
| Taurine      | mg | ND     | ND     | ND     | ND   | ND   | ND   | ND   | ND   | ND   | ND   | ND   |
| L-Threonine  | g  | 2.51   | 2.51   | 2.51   | 6.00 | 6.00 | 5.57 | 5.75 | 5.75 | 5.72 | 2.83 | 2.83 |
| L-Tryptophan | g  | 776.00 | 776.00 | 776.00 | 0.93 | 0.93 | 0.86 | 0.89 | 0.89 | 0.89 | 0.34 | 0.34 |
| L-Tyrosine   | g  | 2.92   | 2.38   | 2.92   | 6.20 | 6.20 | 5.75 | 5.93 | 5.93 | 5.89 | 0.66 | 0.66 |
| L-Valine     | g  | 1.38   | 1.38   | 1.38   | 3.30 | 3.30 | 3.06 | 3.16 | 3.16 | 3.14 | 1.49 | 1.49 |
| L-Carnitine  | mg | ND     | ND     | ND     | ND   | ND   | ND   | ND   | ND   | ND   | ND   | ND   |

| Content per 100 g      | Unit    | MEDIFOOD   |            | NUTRICIA   | MAMOXI     |            |            | MEVALIA    |            | VITAFLO    |             |
|------------------------|---------|------------|------------|------------|------------|------------|------------|------------|------------|------------|-------------|
|                        |         | powdered 1 | powdered 2 | powdered 3 | powdered 4 | powdered 5 | powdered 6 | powdered 7 | powdered 8 | powdered 9 | powdered 10 |
| Vitamin A              | µg RE   | 555.00     | 555.00     | 500.00     | 974.00     | 974.00     | 974.00     | 1248.00    | 1198.00    | 740.00     | 740.00      |
| Vitamin C              | mg      | 72.00      | 72.00      | 72.00      | 114.00     | 114.00     | 114.00     | 187.00     | 180.00     | 74.00      | 74.00       |
| Vitamin D              | µg      | 8.80       | 8.80       | 22.50      | 22.00      | 22.00      | 22.00      | 37.00      | 36.00      | 14.00      | 14.00       |
| Vitamin E              | mg α-TE | 10.40      | 10.40      | 15.30      | 19.00      | 19.00      | 19.00      | 25.00      | 24.00      | 15.00      | 15.00       |
| Vitamin K              | µg      | 67.00      | 67.00      | 72.00      | 70.00      | 70.00      | 70.00      | 75.00      | 72.00      | 67.00      | 67.00       |
| Vitamin B1. Thiamin    | mg      | 1.30       | 1.30       | 1.80       | 2.00       | 2.00       | 2.00       | 2.5.00     | 2.40       | 1.70       | 1.70        |
| Vitamin B2. Riboflavin | mg      | 1.50       | 1.50       | 1.80       | 2.00       | 2.00       | 2.00       | 3.12       | 3.00       | 1.70       | 1.70        |
| Vitamin B3. Niacin     | mg      | 16.50      | 16.50      | 15.00      | 43.00      | 43.00      | 43.00      | 15.00      | 14.00      | 9.10       | 9.10        |
| Niacin (NE)            | mg      | ND         | ND         | ND         | 58.00      | 58.00      | 58.00      | ND         | ND         | 28.00      | 28.00       |
| Vitamin B6             | mg      | 1.90       | 1.90       | 1.70       | 1.70       | 1.70       | 1.70       | 2.50       | 2.40       | 1.70       | 1.70        |
| Total folate           | µg      | 267.00     | 267.00     | 360.00     | 217.00     | 217.00     | 217.00     | 312        | 300.00     | 290.00     | 290.00      |
| Vitamin B12            | µg      | 3.20       | 3.20       | 3.60       | 3.50       | 3.50       | 3.50       | 5.00       | 4.79       | 4.60       | 4.60        |

|                 |    |        |        |         |         |         |         |         |         |         |         |
|-----------------|----|--------|--------|---------|---------|---------|---------|---------|---------|---------|---------|
| Pantotenic acid | mg | 5.00   | 5.00   | 4.80    | 7.00    | 7.00    | 7.00    | 8.74    | 8.39    | 5.70    | 5.70    |
| Biotin          | µg | 125.00 | 125.00 | 36.00   | 44.00   | 44.00   | 44.00   | 75.00   | 72.00   | 36.00   | 36.00   |
| Choline         | mg | 400.00 | 400.00 | 300.00  | 486.00  | 486.00  | 486.00  | 438.00  | 420.00  | 570.00  | 570.00  |
| Calcium         | mg | 797.00 | 797.00 | 1155.00 | 1514.00 | 1514.00 | 1514.00 | 1774.00 | 1703.00 | 1140.00 | 1140.00 |
| Chromium        | µg | 59.00  | 59.00  | 39.60   | 108.00  | 108.00  | 108.00  | 50.00   | 48.00   | 34.00   | 34.00   |
| Copper          | mg | 1.49   | 1.49   | 1.30    | 2.00    | 2.00    | 2.00    | 1.31    | 1.26    | 1.70    | 1.70    |
| Iodine          | µg | 168.00 | 168.00 | 149.00  | 244.00  | 244.00  | 244     | 276.00  | 264.00  | 240.00  | 240.00  |
| Iron            | mg | 14.40  | 14.40  | 14.50   | 19.00   | 19.00   | 19.00   | 25.00   | 21.00   | 21.00   | 21.00   |
| Magnesium       | mg | 251.00 | 251.00 | 277.00  | 292.00  | 292.00  | 292     | 329.00  | 294.00  | 330.00  | 330.00  |
| Manganese       | mg | 2.05   | 2.05   | 1.80    | 6.00    | 6.00    | 6.00    | 1.31    | 1.26    | 1.10    | 1.10    |
| Molybdenum      | µg | 96.00  | 96.00  | 59.40   | 92.00   | 92.00   | 92.00   | 73.00   | 71.00   | 57.00   | 57.00   |
| Phosphorus      | mg | 851.00 | 851.00 | 1040.00 | 935.00  | 935.00  | 935.00  | 1391.00 | 1256.00 | 1180.00 | 1180.00 |
| Selenium        | µg | 59.00  | 59.00  | 52.80   | 79.00   | 79.00   | 79.00   | 62.00   | 60.00   | 86.00   | 86.00   |
| Zinc            | mg | 14.40  | 14.40  | 11.20   | 19.00   | 19.00   | 19.00   | 13.00   | 13.00   | 21.00   | 21.00   |
| Potassium       | mg | 627.00 | 627.00 | 1152.00 | 789.00  | 789.00  | 789.00  | 1753.00 | 1683.00 | 670.00  | 670.00  |
| Sodium          | mg | 339.00 | 339.00 | 512.00  | 606.00  | 673.00  | 674.00  | 329.00  | 315.00  | 810.00  | 810.00  |
| Chloride        | mg | 670.00 | 670.00 | 626.00  | 38.00   | 137.00  | 38.00   | <20     | <20     | 20.00   | 20.00   |
| Fluoride        | mg | ND     | ND     | ND      | 0.80    | 0.80    | 0.80    | ND      | ND      | ND      | ND      |
| Myo-inositol    | mg | ND     | ND     | ND      | 254     | 254     | 254.00  | ND      | ND      | ND      | ND      |
| Salt            | g  | 0.85   | 0.85   | 1.30    | 1.50    | 1.50    | 1.50    | 0.82    | 0.96    | 2.00    | 2.00    |

| Content<br>per 100 g             | Unit           | CAMBROOKE                   |                |                             |                |                |                |                |                |                |                |                |
|----------------------------------|----------------|-----------------------------|----------------|-----------------------------|----------------|----------------|----------------|----------------|----------------|----------------|----------------|----------------|
|                                  |                | powdered<br>11              | powdered<br>12 | powdered<br>13              | powdered<br>14 | powdered<br>15 | powdered<br>16 | powdered<br>17 | powdered<br>18 | powdered<br>19 | powdered<br>20 | powdered<br>21 |
| Vitamin A                        | µg<br>RE       | 707.00                      | 707.00         | 707.00                      | 1098.00        | 1098.00        | 1019.00        | 1052.00        | 1052.00        | 1045.00        | 0.00           | 0.00           |
| Vitamin C                        | mg             | 81.00                       | 81.00          | 81.00                       | 177.00         | 177.00         | 166.00         | 171.00         | 171.00         | 170.00         | 0.00           | 0.00           |
| Vitamin D                        | µg             | 35.00                       | 35.00          | 35.00                       | 48.00          | 48.00          | 44.00          | 45.00          | 45.00          | 45.00          | 0.00           | 0.00           |
| Vitamin E                        | mg<br>α-<br>TE | 12.00                       | 12.00          | 12.00                       | 20.00          | 20.00          | 19.00          | 19.00          | 19.00          | 18.00          | 0.00           | 0.00           |
| Vitamin K                        | µg             | 80.00                       | 80.00          | 80.00                       | 60.00          | 60.00          | 112.00         | 114.00         | 114.00         | 114.00         | 0.00           | 0.00           |
| Vitamin<br>B1.<br>Thiamin        | mg             | 1.50                        | 1.50           | 1.50                        | 60.00          | 60.00          | 1.50           | 1.60           | 1.60           | 1.60           | 0.00           | 0.00           |
| Vitamin<br>B2.<br>Riboflavi<br>n | mg             | 1.50                        | 1.50           | 1.50                        | 1.70           | 1.70           | 1.50           | 1.60           | 1.60           | 1.60           | 1.60           | 1.60           |
| Vitamin<br>B3. Niacin            | mg             | 28.00                       | 28.00          | 28.00                       | 1.70           | 1.70           | 33.00          | 34.00          | 34.00          | 34.00          | 20.00          | 20.00          |
| Niacin<br>(NE)                   | mg             | ND                          | ND             | ND                          | ND             | ND             | ND             | ND             | ND             | ND             |                |                |
| Vitamin<br>B6                    | mg             | 1.50                        | 1.50           | 1.50                        | 1.70           | 1.70           | 1.60           | 1.60           | 1.60           | 1.60           | 2.00           | 2.00           |
| Total<br>folate                  | µg             | 199.00<br>(337.00<br>ugDFE) | 199.00         | 288.00<br>(337.00<br>ugDFE) | 240.00         | 240.00         | 219.00         | 226.00         | 226.00         | 224.00         | 400.00         | 400.00         |
| Vitamin<br>B12                   | µg             | 2.80                        | 2.80           | 2.80                        | 3.00           | 3.00           | 2.80           | 2.90           | 2.90           | 2.90           | 6.00           | 6.00           |
| Pantoteni<br>c acid              | mg             | 3.10                        | 5.60           | 5.60                        | 7.30           | 7.30           | 6.80           | 7.00           | 7.00           | 7.10           | 10.00          | 10.00          |
| Biotin                           | µg             | 24.00                       | 24.00          | 24.00                       | 32.00          | 32.00          | 30.00          | 31.00          | 31.00          | 30.00          | 300.00         | 300.00         |
| Choline                          | mg             | 375.00                      | 375.00         | 375.00                      | 99.00          | 99.00          | 92.00          | 95.00          | 95.00          | 95.00          | 0.00           | 0.00           |
| Calcium                          | mg             | 1353.00                     | 1353.00        | 1354.00                     | 1774.00        | 1774.00        | 1668.00        | 1742.00        | 1742.00        | 1731.00        | 20.00          | 20.00          |
| Chromiu<br>m                     | µg             | 33.00                       | 25.00          | 33.00                       | 52.00          | 52.00          | 50.00          | 52.00          | 52.00          | 51.00          | 0.00           | 0.00           |
| Copper                           | mg             | 0.94                        | 0.94           | 0.94                        | 0.70           | 0.70           | 0.60           | 0.60           | 0.60           | 0.60           | 0.00           | 0.00           |
| Iodine                           | µg             | 163.00                      | 163.00         | 163.00                      | 229.00         | 229.00         | 213.00         | 219.00         | 219.00         | 218.00         | 0.00           | 0.00           |
| Iron                             | mg             | 16.00                       | 16.00          | 16.00                       | 0.03           | 0.03           | 0.02           | 0.03           | 0.03           | 0.03           | 0.00           | 0.00           |
| Magnesi<br>um                    | mg             | 168.00                      | 168.00         | 168.00                      | 327.00         | 327.00         | 303.00         | 313.00         | 313.00         | 311.00         | 18.00          | 18.00          |

|              |    |         |         |         |         |         |         |         |         |         |        |        |
|--------------|----|---------|---------|---------|---------|---------|---------|---------|---------|---------|--------|--------|
| Manganese    | mg | 2.30    | 2.30    | 2.30    | 0.00    | 0.00    | 0.00    | 0.00    | 0.00    | 0.00    | 0.00   | 0.00   |
| Molybdenum   | µg | 46.00   | 46.00   | 46.00   | 60.00   | 60.00   | 56.00   | 58.00   | 58.00   | 0.06    | 0.00   | 0.00   |
| Phosphorus   | mg | 1089.00 | 1089.00 | 1089.00 | 1676.00 | 1676.00 | 1556    | 1606.00 | 1606.00 | 1596.00 | 100.00 | 100.00 |
| Selenium     | µg | 45.00   | 45.00   | 45.00   | 80.00   | 80.00   | 74.00   | 77.00   | 77.00   | 76.00   | 0.00   | 0.00   |
| Zinc         | mg | 7.50    | 7.50    | 7.50    | 15.00   | 15.00   | 14.00   | 15.00   | 15.00   | 14.00   | 0.00   | 0.00   |
| Potassium    | mg | 1228.00 | 1240.00 | 1241.00 | 1822.00 | 1822.00 | 1750.00 | 1806.00 | 1806.00 | 1795.00 | 645.00 | 655.00 |
| Sodium       | mg | 726.00  | 472.00  | 471.00  | 881.00  | 881.00  | 844.00  | 871.00  | 871.00  | 865.00  | 890.00 | 835.00 |
| Chloride     | mg | 583.00  | 179.00  | 189.00  | 732.00  | 732.00  | 719.00  | 742.00  | 742.00  | 737.00  | 245.00 | 245.00 |
| Fluoride     | mg | ND      | ND     | ND     |
| Myo-inositol | mg | ND      | ND     | ND     |
| Salt         | g  | 1.80    | 1.20    | 1.20    | 2.20    | 2.20    | 2.10    | 2.20    | 2.20    | 2.20    | 2.00   | 2.00   |



**Explanation of GMP-based protein substitutes – powdered.**

MEDIFOOD. GMP-based powdered 1: Afeñil GMP Up Shake milk; GMP-based powdered 2: Afeñil GMP Up Shake orange. Recommended serving of 25 g.

NUTRICIA. GMP-based powdered 3: PKU GMPPro. Recommended serving of 33,3 g.

MAMOXI. GMP-based powdered 4: XPhe Enjoy GMP Fibre; GMP-based powdered 5: XPhe Enjoy GMP Chocolate Fibre; GMP-based powdered 6: XPhe Enjoy GMP Vanilla Fibre. Recommended serving of 18,5 g or 37 g.

MEVALIA. GMP-based powdered 7: PKU GMP Power; GMP-based powdered 8: PKU GMP Power Pina Colada. Recommended serving of 24,4 g.

VITAFLO. GMP-based powdered 9: PKU Sphere 15; \$ PKU Sphere 15 Chocolate. Recommended serving of 27 g. GMP-based powdered 10: PKU Sphere 20. Recommended serving of 35 g.

CAMBROOKE. GMP-based powdered 11: Glytactin Bettermilk 15; GMP-based powdered 12: Glytactin Bettermilk 15 Orange; GMP-based powdered 13: Glytactin Bettermilk 15 Strawberry; Recommended serving of 40 g. GMP-based powdered 14: Glytactin Build 10; Recommended serving of 15 g. GMP-based powdered 15: Glytactin Build 20; Recommended serving of 30 g. GMP-based powdered 16: Glytactin Build 20 Chocolate; Recommended serving of 32 g. GMP-based powdered 17: Glytactin Build 20 Raspberry Lemonade; Recommended serving of 31 g. GMP-based powdered 18: Glytactin Build 20 Vanilla; Recommended serving of 33 g. GMP-based powdered 19: Glytactin Build 20 Smooth; Recommended serving of 31 g. GMP-based powdered 20: Glytactin Restore Powder Orange; GMP-based powdered 21: Glytactin Restore Powder Berry; Recommended serving of 20 g.

**Table S2.** Food components contained in 100 ml of GMP-based protein substitute – ready to drink. If nutritional data was not present nutritional label, the term “Not Declared” (ND) was used.

| Content per 100 ml | Unit | NUTRICIA         | CAMBROOKE        |                  |                  |                  |                  |                  |                  |
|--------------------|------|------------------|------------------|------------------|------------------|------------------|------------------|------------------|------------------|
|                    |      | ready to drink 1 | ready to drink 2 | ready to drink 3 | ready to drink 4 | ready to drink 5 | ready to drink 6 | ready to drink 7 | ready to drink 8 |
| Energy             | Kj   | 188              | 272.8            | 272.8            | 346              | 346              | 201              | 201              | 59               |
| Energy             | Kcal | 45               | 64.6             | 64.6             | 82               | 82               | 48               | 48               | 14               |

| Content per 100 ml          | Unit | NUTRICIA         | CAMBROOKE        |                  |                  |                  |                  |                  |                  |
|-----------------------------|------|------------------|------------------|------------------|------------------|------------------|------------------|------------------|------------------|
|                             |      | ready to drink 1 | ready to drink 2 | ready to drink 3 | ready to drink 4 | ready to drink 5 | ready to drink 6 | ready to drink 7 | ready to drink 8 |
| Total fats                  | g    | 1.60             | 1.40             | 1.40             | 2.00             | 2.00             | 1.40             | 1.40             | 0.00             |
| Saturated fatty acids       | g    | 0.16             | 0.40             | 0.40             | 0.80             | 0.80             | 0.20             | 0.20             | 0.00             |
| Monounsaturated fatty acids | g    | 0.95             | ND               |
| Polyunsaturated fatty acids | g    | 0.49             | ND               |
| Decosahexaenoic acid (DHA)  | mg   | 24.00            | ND               | ND               | ND               | ND               | 44.00            | 44.00            | ND               |
| Eicosapentaenoic acid       | mg   | 6.00             | ND               |
| Carbohydrates               | g    | 3.40             | 9.00             | 9.00             | 10.00            | 10.00            | 2.90             | 3.00             | 1.40             |
| Sugars                      | g    | 3.00             | 7.00             | 7.00             | 8.00             | 8.00             | 0.00             | 0.00             | 1.00             |
| Fiber                       | g    | 0.37             | 0.40             | 0.00             | 0.40             | 0.40             | 0.90             | 0.90             | 0.00             |
| Protein equivalents         | g    | 4.00             | 4.00             | 4.00             | 6.00             | 6.00             | 6.00             | 6.00             | 2.00             |

| Content per 100 ml | Unit | NUTRICIA         | CAMBROOKE        |                  |                  |                  |                  |                  |                  |
|--------------------|------|------------------|------------------|------------------|------------------|------------------|------------------|------------------|------------------|
|                    |      | ready to drink 1 | ready to drink 2 | ready to drink 3 | ready to drink 4 | ready to drink 5 | ready to drink 6 | ready to drink 7 | ready to drink 8 |
| L-Alanine          | g    | 0.16             | 0.14             | 0.14             | 0.22             | 0.22             | 0.23             | 0.23             | 0.10             |

|                 |    |       |      |      |       |       |      |      |      |
|-----------------|----|-------|------|------|-------|-------|------|------|------|
| L-Arginine      | g  | 0.19  | 0.41 | 0.41 | 0.62  | 0.62  | 0.60 | 0.60 | 0.22 |
| L-Aspartic acid | g  | 0.24  | 0.22 | 0.22 | 0.32  | 0.32  | 0.30 | 0.30 | 0.14 |
| L-Cystine       | g  | 0.12  | 0.00 | 0.00 | 0.00  | 0.00  | 0.00 | 0.00 | 0.00 |
| L-Glutamic acid | g  | 0.54  | 0.52 | 0.52 | 0.80  | 0.80  | 0.74 | 0.74 | 0.33 |
| Glycine         | g  | 0.03  | 0.30 | 0.03 | 0.42  | 0.04  | 0.04 | 0.04 | 0.01 |
| L-Histidine     | g  | 0.16  | 0.87 | 0.87 | 0.13  | 0.13  | 0.14 | 0.14 | 0.05 |
| L-Isoleucine    | g  | 0.29  | 0.25 | 0.25 | 0.38  | 0.38  | 0.39 | 0.39 | 0.18 |
| L-Leucine       | g  | 0.61  | 0.79 | 0.79 | 1.20  | 1.20  | 1.08 | 1.08 | 0.42 |
| L-Lysine        | g  | 0.17  | 0.17 | 0.17 | 0.26  | 0.26  | 0.36 | 0.36 | 0.10 |
| L-Methionine    | g  | 0.05  | 0.04 | 0.04 | 0.60  | 0.06  | 0.06 | 0.67 | 0.03 |
| L-Phenylalanine | mg | 7.20  | 7.20 | 7.20 | 10.80 | 10.80 | 6.00 | 6.00 | 3.00 |
| L-Proline       | g  | 0.32  | 0.34 | 0.34 | 0.51  | 0.51  | 0.43 | 0.43 | 0.20 |
| L-Serine        | g  | 0.20  | 0.14 | 0.14 | 0.22  | 0.22  | 0.24 | 0.24 | 0.13 |
| Taurine         | mg | 12.00 | ND   | ND   | ND    | ND    | ND   | ND   | ND   |
| L-Threonine     | g  | 0.45  | 0.43 | 0.43 | 0.64  | 0.64  | 0.61 | 0.61 | 0.22 |
| L-Tryptophan    | g  | 0.10  | 0.06 | 0.62 | 0.93  | 0.93  | 0.08 | 0.84 | 0.03 |
| L-Tyrosine      | g  | 0.40  | 0.30 | 0.30 | 0.46  | 0.46  | 0.55 | 0.55 | 0.06 |
| L-Valine        | g  | 0.35  | 0.22 | 0.22 | 0.33  | 0.33  | 0.33 | 0.33 | 0.15 |
| L-Carnitine     | mg | 5.80  | ND   | ND   | ND    | ND    | ND   | ND   | ND   |

| Content per 100 ml | Unit  | NUTRICIA         | CAMBROOKE        |                  |                  |                  |                  |                  |                  |
|--------------------|-------|------------------|------------------|------------------|------------------|------------------|------------------|------------------|------------------|
|                    |       | ready to drink 1 | ready to drink 2 | ready to drink 3 | ready to drink 4 | ready to drink 5 | ready to drink 6 | ready to drink 7 | ready to drink 8 |
| Vitamin A          | µg RE | 80.00            | 102.00           | 102.00           | 108.00           | 108.00           | 108.00           | 108.00           | ND               |
| Vitamin C          | mg    | 6.20             | 8.00             | 8.00             | 11.20            | 11.20            | 11.00            | 11.00            | ND               |

|                           |                |        |        |        |        |        |        |        |       |
|---------------------------|----------------|--------|--------|--------|--------|--------|--------|--------|-------|
| Vitamin D                 | µg             | 2.50   | 2.50   | 2.50   | 2.50   | 2.50   | 2.50   | 2.50   | ND    |
| Vitamin E                 | mg<br>α-<br>TE | 1.30   | 0.90   | 0.90   | 0.90   | 0.90   | 0.90   | 0.90   | ND    |
| Vitamin K                 | µg             | 7.00   | 12.00  | 12.00  | 12.00  | 12.00  | 12.00  | 12.00  | ND    |
| Vitamin B1.<br>Thiamin    | mg             | 0.16   | 0.20   | 0.20   | 0.20   | 0.20   | 0.20   | 0.20   | ND    |
| Vitamin B2.<br>Riboflavin | mg             | 0.16   | 0.20   | 0.20   | 0.20   | 0.20   | 0.20   | 0.20   | 0.10  |
| Vitamin B3.<br>Niacin     | mg             | 1.40   | 1.60   | 1.60   | 2.00   | 2.00   | 2.00   | 2.00   | 1.00  |
| Vitamin B6                | mg             | 0.14   | 0.20   | 0.20   | 0.20   | 0.20   | 0.20   | 0.20   | 0.10  |
| Total folate              | µg             | 20.00  | 53.20  | 53.20  | 56.00  | 56.00  | 24.00  | 24.00  | 20.00 |
| Vitamin B12               | µg             | 0.28   | 0.30   | 0.30   | 0.30   | 0.30   | 0.30   | 0.30   | 0.40  |
| Pantotenic<br>acid        | mg             | 0.52   | 0.70   | 0.70   | 0.70   | 0.70   | 0.70   | 0.70   | 0.50  |
| Biotin                    | µg             | 3.10   | 3.20   | 3.20   | 3.20   | 3.20   | 3.20   | 3.20   | 15.00 |
| Choline                   | mg             | 37.50  | 81.20  | 81.20  | 82.40  | 82.40  | 80.00  | 80.00  | ND    |
| Calcium                   | mg             | 144.00 | 130.00 | 130.00 | 140.00 | 140.00 | 141.00 | 141.00 | 2.00  |
| Chromium                  | µg             | 3.30   | 4.00   | 4.00   | 5.20   | 5.20   | 5.20   | 5.20   | ND    |
| Copper                    | mg             | 0.10   | 0.10   | 0.10   | 0.10   | 0.10   | 0.10   | 0.10   | ND    |
| Iodine                    | µg             | 16.20  | 22.80  | 22.80  | 22.80  | 22.80  | 23.00  | 23.00  | ND    |
| Iron                      | mg             | 1.40   | 1.60   | 1.60   | 1.80   | 1.80   | 2.00   | 2.00   | ND    |
| Magnesium                 | mg             | 26.00  | 30.80  | 30.80  | 48.00  | 48.00  | 54.00  | 54.00  | 1.30  |
| Manganese                 | mg             | 0.10   | 0.30   | 0.30   | 0.30   | 0.30   | 0.30   | 0.30   | ND    |
| Molybdenu<br>m            | µg             | 5.50   | 5.60   | 5.60   | 6.00   | 6.00   | 6.00   | 6.00   | ND    |
| Phosphorus                | mg             | 121.00 | 126.00 | 126.00 | 126.00 | 126.00 | 125.00 | 125.00 | 8.00  |
| Selenium                  | µg             | 5.50   | 8.20   | 8.20   | 8.00   | 8.00   | 8.00   | 8.00   | ND    |
| Zinc                      | mg             | 0.96   | 1.30   | 1.30   | 1.30   | 1.30   | 1.30   | 1.30   | ND    |
| Potassium                 | mg             | 82.40  | 136.00 | 136.00 | 136    | 136.00 | 141.00 | 141.00 | 44.00 |

|          |    |       |        |        |       |       |        |        |       |
|----------|----|-------|--------|--------|-------|-------|--------|--------|-------|
| Sodium   | mg | 8.10  | 100.00 | 100.00 | 96.00 | 96.00 | 114.00 | 114.00 | 76.00 |
| Chloride | mg | 44.00 | 64.00  | 64.00  | 64.80 | 64.80 | 116.00 | 116.00 | 1.60  |
| Salt     | g  | 0.16  | 0.25   | 0.25   | 0.24  | 0.24  | 0.30   | 0.30   | 0.19  |

**Explanation of GMP-based protein substitutes – ready to drink.**

NUTRICIA. GMP-based ready to drink 1: PKU GMPPro LQ.

CAMBROOKE. GMP-based ready to drink 2: Glytactin RTD 10 smooth; GMP-based ready to drink 3: Glytactin RTD 10 chocolate; GMP-based ready to drink 4: Glytactin RTD 15 smooth; GMP-based ready to drink 5: Glytactin RTD 15 chocolate; GMP-based ready to drink 6: Glytactin RTD 15 lite mocha; GMP-based ready to drink 7: Glytactin RTD 15 lite vanilla; GMP-based ready to drink 8: Glytactin restore lite 10 Tangerine.

All recommended servings are of 250 ml, apart from GMP-based ready to drink 8 whose recommended serving is of 480 ml.

**Table S3.** Food components contained in 100 g and per portion of GMP-based protein substitute - bar. If nutritional data was not present nutritional label, the term “Not Declared” (ND) was used.

| Content per 100 g and per portion | Unit | MEDIFOOD     |               |              |               | CAMBROOKE    |               |              |               |              |               |              |               |
|-----------------------------------|------|--------------|---------------|--------------|---------------|--------------|---------------|--------------|---------------|--------------|---------------|--------------|---------------|
|                                   |      | bar 1 (50 g) | bar 1 (100 g) | bar 2 (60 g) | bar 2 (100 g) | bar 3 (54 g) | bar 3 (100 g) | bar 4 (81 g) | bar 4 (100 g) | bar 5 (54 g) | bar 5 (100 g) | bar 6 (81 g) | bar 6 (100 g) |
| Energy                            | Kj   | 661          | 1322          | 884          | 1473          | 878.60       | 1627.6        | 1338.9       | 1652.7        | 920.5        | 1702.9        | 1380.7       | 1702.9        |
| Energy                            | Kcal | 156          | 313           | 210          | 349           | 210          | 389           | 320          | 395           | 220          | 407           | 330          | 407           |

| Content per 100 g and per portion | Unit | MEDIFOOD     |               |              |               | CAMBROOKE    |               |              |               |              |               |              |               |
|-----------------------------------|------|--------------|---------------|--------------|---------------|--------------|---------------|--------------|---------------|--------------|---------------|--------------|---------------|
|                                   |      | bar 1 (50 g) | bar 1 (100 g) | bar 2 (60 g) | bar 2 (100 g) | bar 3 (54 g) | bar 3 (100 g) | bar 4 (81 g) | bar 4 (100 g) | bar 5 (54 g) | bar 5 (100 g) | bar 6 (81 g) | bar 6 (100 g) |
| Total fats                        | g    | 0.90         | 1.80          | 4.30         | 7.20          | 6.00         | 11.10         | 8.00         | 9.90          | 8.00         | 14.80         | 12.00        | 14.80         |
| Saturated fatty acids             | g    | 0.40         | 0.80          | 3.40         | 5.70          | 4.00         | 7.40          | 6.00         | 7.40          | 7.00         | 13.00         | 9.00         | 11.10         |
| Carbohydrates                     | g    | 24.70        | 50.00         | 30.20        | 50.00         | 30.00        | 56.00         | 45.00        | 56.00         | 26.00        | 48.00         | 34.00        | 47.00         |
| Sugars                            | g    | 6.20         | 12.40         | 12.00        | 20.00         | 14.00        | 26.00         | 19.00        | 23.00         | 19.00        | 35.00         | 25.00        | 31.00         |
| Polyols                           | g    | ND           | ND            | ND           | ND            | 5.00         | 9.00          | 7.00         | 9.00          | 1.00         | 2.00          | 1.00         | 1.00          |
| Fiber                             | g    | 5.00         | 8.40          | 5.00         | 8.40          | 2.00         | 4.00          | 3.00         | 4.00          | 2.00         | 4.00          | 3.00         | 4.00          |
| Protein equivalents               | g    | 10.00        | 20.00         | 10.00        | 16.70         | 10.00        | 19.00         | 15.00        | 19.00         | 10.00        | 19.00         | 15.00        | 19.00         |

| Content per 100 g and per portion | Unit | MEDIFOOD     |               |              |               | CAMBROOKE    |               |              |               |              |               |              |               |
|-----------------------------------|------|--------------|---------------|--------------|---------------|--------------|---------------|--------------|---------------|--------------|---------------|--------------|---------------|
|                                   |      | bar 1 (50 g) | bar 1 (100 g) | bar 2 (60 g) | bar 2 (100 g) | bar 3 (54 g) | bar 3 (100 g) | bar 4 (81 g) | bar 4 (100 g) | bar 5 (54 g) | bar 5 (100 g) | bar 6 (81 g) | bar 6 (100 g) |
| L-Alanine                         | g    | 0.45         | 0.90          | 0.45         | 0.75          | 0.40         | 0.74          | 0.58         | 0.71          | 0.40         | 0.74          | 0.60         | 0.74          |
| L-Arginine                        | g    | 0.54         | 1.08          | 0.54         | 0.90          | 1.10         | 2.03          | 1.60         | 1.97          | 1.00         | 1.85          | 1.30         | 1.60          |
| L-Aspartic acid                   | g    | 0.66         | 1.32          | 0.66         | 1.10          | 0.60         | 1.11          | 0.88         | 1.08          | 0.50         | 0.92          | 0.88         | 1.08          |
| L-Cystine                         | g    | 0.66         | 12.62         | 6.31         | 10.52         | 0.00         | 0.00          | 0.02         | 0.02          | 0.00         | 0.00          | 0.02         | 0.24          |
| L-Glutamine                       | g    | 1.50         | 3.00          | 1.50         | 2.50          | 1.30         | 2.40          | 1.90         | 2.34          | 1.20         | 2.22          | 2.10         | 2.59          |
| Glycine                           | g    | 0.08         | 0.16          | 0.08         | 0.13          | 0.10         | 0.18          | 0.12         | 0.14          | 0.10         | 0.18          | 0.12         | 0.14          |
| L-                                | g    | 0.41         | 0.82          | 0.41         | 0.68          | 0.30         | 0.55          | 0.38         | 0.46          | 0.20         | 0.37          | 0.38         | 0.46          |

|                 |    |       |       |       |       |       |      |       |      |       |       |       |      |
|-----------------|----|-------|-------|-------|-------|-------|------|-------|------|-------|-------|-------|------|
| Histidine       |    |       |       |       |       |       |      |       |      |       |       |       |      |
| L-Isoleucine    | g  | 0.76  | 1.52  | 0.76  | 1.27  | 0.69  | 1.27 | 1.04  | 1.28 | 0.66  | 1.22  | 0.99  | 1.22 |
| L-Leucine       | g  | 1.29  | 2.58  | 1.29  | 2.15  | 2.03  | 3.75 | 3.04  | 3.75 | 1.92  | 3.55  | 2.88  | 3.55 |
| L-Lysine        | g  | 0.78  | 1.56  | 0.78  | 1.30  | 0.40  | 0.74 | 0.58  | 0.71 | 0.40  | 0.74  | 0.59  | 0.72 |
| L-Methionine    | g  | 0.14  | 0.28  | 0.14  | 0.23  | 0.10  | 0.18 | 0.15  | 0.18 | 0.10  | 0.18  | 0.15  | 0.18 |
| L-Phenylalanine | mg | 12.62 | 25.24 | 12.62 | 21.03 | 24.00 | 44.4 | 37.00 | 45.7 | 22.00 | 40.70 | 32.00 | 39.5 |
| L-Proline       | g  | 0.88  | 1.76  | 0.88  | 1.47  | 0.80  | 1.48 | 1.30  | 1.60 | 0.80  | 1.48  | 1.30  | 1.60 |
| L-Serine        | g  | 0.57  | 1.14  | 0.57  | 0.95  | 0.40  | 0.74 | 0.66  | 0.81 | 0.40  | 0.74  | 0.62  | 0.76 |
| Taurine         | mg | ND    | ND    | ND    | ND    | ND    | ND   | ND    | ND   | ND    | ND    | ND    | ND   |
| L-Threonine     | g  | 1.27  | 2.54  | 1.27  | 2.12  | 1.10  | 2.03 | 1.62  | 2.00 | 1.00  | 1.85  | 1.51  | 1.86 |
| L-Tryptophan    | g  | 0.22  | 0.44  | 0.22  | 0.37  | 0.11  | 0.20 | 0.18  | 0.22 | 0.10  | 0.18  | 0.18  | 0.22 |
| L-Tyrosine      | g  | 1.43  | 2.86  | 1.43  | 2.38  | 0.86  | 1.59 | 1.30  | 1.60 | 0.84  | 1.55  | 1.26  | 1.55 |
| L-Valine        | g  | 0.81  | 1.62  | 0.81  | 1.35  | 0.59  | 1.09 | 0.90  | 1.11 | 0.59  | 1.09  | 0.89  | 1.09 |
| L-Carnitine     | mg | ND    | ND    | ND    | ND    | ND    | ND   | ND    | ND   | ND    | ND    | ND    | ND   |
| L-Glutamic acid | g  | ND    | ND    | ND    | ND    | ND    | ND   | ND    | ND   | ND    | ND    | ND    | ND   |

| Content per 100 g and per portion | Unit    | MEDIFOOD     |               |              |               | CAMBROOKE    |               |              |               |              |               |              |               |
|-----------------------------------|---------|--------------|---------------|--------------|---------------|--------------|---------------|--------------|---------------|--------------|---------------|--------------|---------------|
|                                   |         | bar 1 (50 g) | bar 1 (100 g) | bar 2 (60 g) | bar 2 (100 g) | bar 3 (54 g) | bar 3 (100 g) | bar 4 (81 g) | bar 4 (100 g) | bar 5 (54 g) | bar 5 (100 g) | bar 6 (81 g) | bar 6 (100 g) |
| Vitamin A                         | µg RE   | 277.00       | 554.00        | 139.00       | 231.00        | 475.20       | 880.00        | 702.60       | 867.30        | 472.20       | 874.50        | 543.50       | 671.00        |
| Vitamin C                         | mg      | 36.00        | 72.00         | 18.00        | 30.00         | 17.00        | 31.50         | 34.00        | 42.00         | 17.00        | 31.50         | 29.20        | 36.00         |
| Vitamin D                         | µg      | 4.00         | 8.00          | 2.20         | 4.00          | 8.70         | 16.00         | 5.80         | 7.20          | 10.00        | 18.50         | 6.30         | 7.70          |
| Vitamin E                         | mg α-TE | 5.00         | 10.00         | 2.60         | 4.00          | 3.40         | 6.30          | 3.80         | 4.70          | 3.20         | 5.90          | 3.80         | 4.70          |
| Vitamin K                         | µg      | 33.00        | 66.00         | 17.00        | 28.00         | 33.00        | 61.10         | 35.40        | 43.70         | 32.90        | 60.90         | 35.00        | 43.2          |
| Vitamin B1. Thiamin               | mg      | 0.67         | 1.34          | 0.30         | 0.60          | 0.40         | 0.70          | 0.50         | 0.60          | 0.40         | 0.70          | 0.50         | 0.60          |
| Vitamin                           | mg      | 0.76         | 1.52          | 0.38         | 0.60          | 0.70         | 1.30          | 0.50         | 0.60          | 0.40         | 0.70          | 0.50         | 0.60          |

|                    |    |        |         |        |        |        |        |        |        |        |        |        |        |
|--------------------|----|--------|---------|--------|--------|--------|--------|--------|--------|--------|--------|--------|--------|
| B2. Riboflavin     |    |        |         |        |        |        |        |        |        |        |        |        |        |
| Vitamin B3. Niacin | mg | 8.00   | 16.00   | 4.10   | 7.00   | 5.60   | 10.40  | 6.10   | 7.50   | 5.80   | 10.70  | 6.10   | 7.50   |
| Vitamin B6         | mg | 0.90   | 1.80    | 0.50   | 0.80   | 0.40   | 0.70   | 0.50   | 0.60   | 0.40   | 0.70   | 0.50   | 0.60   |
| Total folate       | µg | 133.00 | 266.00  | 67.00  | 111.00 | 119.30 | 220.90 | 136.50 | 168.50 | 119.00 | 220.40 | 136.00 | 169.00 |
| Vitamin B12        | µg | 2.00   | 4.00    | 0.80   | 1.00   | 0.80   | 1.50   | 0.90   | 1.10   | 0.80   | 1.50   | 0.90   | 1.10   |
| Pantotenic acid    | mg | 2.70   | 5.40    | 1.30   | 2.20   | 1.80   | 3.30   | 1.70   | 2.10   | 1.80   | 3.30   | 1.70   | 2.10   |
| Biotin             | µg | 63.00  | 126.00  | 31.00  | 52.00  | 7.20   | 13.30  | 8.50   | 10.50  | 7.20   | 13.30  | 8.50   | 10.5   |
| Choline            | mg | 100.00 | 200.00  | 100.00 | 166.67 | 166.60 | 308.50 | 209.20 | 258.30 | 149.90 | 277.60 | 209.10 | 258.10 |
| Calcium            | mg | 399.00 | 798.00  | 199.00 | 332.00 | 518.90 | 960.90 | 626.50 | 773.50 | 545.80 | 545.80 | 652.90 | 806.00 |
| Chromium           | µg | 29.00  | 58.00   | 15.00  | 24.00  | 10.00  | 18.50  | 13.30  | 16.40  | 8.90   | 16.50  | 13.20  | 16.30  |
| Copper             | mg | 747.00 | 1494.00 | 373.00 | 622.00 | 0.30   | 0.60   | 0.30   | 0.40   | 0.20   | 0.40   | 0.30   | 0.40   |
| Iodine             | µg | 84.00  | 168.00  | 42.00  | 70.00  | 59.80  | 110.70 | 56.90  | 70.20  | 58.80  | 108.90 | 65.20  | 80.5   |
| Iron               | mg | 7.00   | 14.00   | 3.60   | 6.00   | 7.70   | 14.30  | 5.80   | 7.20   | 6.50   | 12.00  | 5.90   | 7.30   |
| Magnesium          | mg | 125.00 | 250.00  | 63.00  | 104.00 | 86.40  | 160.00 | 134.60 | 166.20 | 83.20  | 154.10 | 136.90 | 169.00 |
| Manganese          | mg | 1.00   | 2.00    | 0.51   | 0.90   | 0.90   | 1.70   | 0.90   | 1.10   | 0.80   | 1.50   | 4.90   | 6.00   |
| Molybdenum         | µg | 48.00  | 96.00   | 24.00  | 40.00  | 14.60  | 27.00  | 16.30  | 20.10  | 13.10  | 24.30  | 16.20  | 20.00  |
| Phosphorus         | mg | 425.00 | 850.00  | 213.00 | 354.00 | 356.90 | 660.90 | 479.90 | 592.50 | 358.00 | 663.0  | 463.30 | 572.00 |
| Selenium           | µg | 29.00  | 58.00   | 15.00  | 25.00  | 20.10  | 37.20  | 21.00  | 25.90  | 18.60  | 34.40  | 22.00  | 27.20  |
| Zinc               | mg | 7.00   | 14.00   | 4.00   | 6.00   | 3.10   | 5.70   | 4.60   | 5.70   | 3.30   | 6.10   | 4.90   | 6.00   |
| Potassium          | mg | 313.00 | 626.00  | 157.00 | 261.00 | 160.00 | 296.30 | 375.00 | 463.00 | 170.00 | 314.80 | 375.00 | 463.00 |
| Sodium             | mg | 169.00 | 338.00  | 85.00  | 141.00 | 135.00 | 250.00 | 204.00 | 251.00 | 140.00 | 259.30 | 220.00 | 271.60 |
| Chloride           | mg | 335.00 | 670.00  | 167.00 | 279.00 | 8.90   | 16.50  | 13.50  | 16.70  | 14.90  | 27.60  | 25.10  | 31.00  |
| Salt               | g  | 0.21   | 0.35    | 0.21   | 0.35   | 0.30   | 0.60   | 0.40   | 0.50   | 0.30   | 0.60   | 0.50   | 0.70   |

**Explanation of GMP-based protein substitutes – bar.**

MEDIFOOD. GMP-based bar 1: AFENIL GMP UP BAR CREAM-MOU; GMP-based bar 2: AFENIL GMP UP BAR COCONUT.



CAMBROOKE. GMP-based bar 3: Glytactin Complete cocoa 10; GMP-based bar 4: Glytactin Complete cocoa 15; GMP-based bar 5: Glytactin Complete fruit 10; GMP-based bar 5: Glytactin Complete fruit 15.

**Table S4.** Mean of the food components contained in 100 g of 3 different L-AAs powdered protein substitute available for children with PKU from 3 years of age. If nutritional data was not present nutritional label, the term “Not Declared” (ND) was used.

| Content per 100 g | Unit | MEDIFOOD | MAMOXI | NUTRICIA | MEAN OF 3 L-AAs PS |
|-------------------|------|----------|--------|----------|--------------------|
| Energy            | Kj   | 1409     | 1291   | 1487     | 1395.7             |
| Energy            | Kcal | 334      | 304    | 350      | 329.3              |

| Content per 100 g           | Unit | MEDIFOOD | MAMOXI | NUTRICIA | MEAN OF 3 L-AAs PS |
|-----------------------------|------|----------|--------|----------|--------------------|
| Total fats                  | g    | <0.5     | <0.3   | 1.50     | 1.50*              |
| Saturated fatty acids       | g    | <0.1     | <0.1   | 0.52     | 0.52*              |
| Monounsaturated fatty acids | g    | ND       | 0.0    | 0.35     | 0.18*              |
| Polyunsaturated fatty acids | g    | ND       | 0.0    | 0.59     | 0.30*              |
| Docosahexaenoic acid (DHA)  | mg   | ND       | ND     | 540      | 540*               |
| Eicosapentaenoic acid       | mg   | ND       | ND     | ND       | ND                 |
| Carbohydrates               | g    | 28.00    | 11.00  | 13.60    | 17.53              |
| Sugars                      | g    | 2.90     | 9.00   | 0.10     | 4.00               |
| Maltose                     | g    | ND       | ND     | ND       | ND                 |
| Sucrose                     | g    | ND       | ND     | ND       | ND                 |
| Fiber                       | g    | 21.00    | 1.00   | 0.83     | 7.61               |
| Protein equivalents         | g    | 45.00    | 63.00  | 71.40    | 59.80              |

| Content per 100 g | Unit | MEDIFOOD | MAMOXI | NUTRICIA | MEAN OF 3 L-AAs PS |
|-------------------|------|----------|--------|----------|--------------------|
| L-Alanine         | g    | 1.81     | 3.40   | 3.71     | 2.97               |
| L-Arginine        | g    | 2.89     | 3.10   | 6.36     | 4.12               |
| L-Aspartic acid   | g    | 4.58     | 9.00   | 5.57     | 6.38               |
| L-Cystine         | mg   | 1.19     | 1.80   | 1.64     | 1.54               |
| L-Glutamic acid   | g    | 3.55     | 5.80   | 7.64     | 5.66               |
| Glycine           | g    | 4.52     | 7.20   | 5.93     | 5.88               |
| L-Histidine       | g    | 1.81     | 2.80   | 3.30     | 2.64               |
| L-Isoleucine      | g    | 3.13     | 4.00   | 5.10     | 4.08               |

|                 |    |       |       |        |        |
|-----------------|----|-------|-------|--------|--------|
| L-Leucine       | g  | 4.87  | 6.80  | 8.70   | 6.79   |
| L-Lysine        | g  | 3.24  | 4.40  | 5.90   | 4.51   |
| L-Methionine    | g  | 0.83  | 1.30  | 1.40   | 1.18   |
| L-Phenylalanine | mg | 0.00  | 0.00  | 0.00   | 0.00   |
| L-Proline       | g  | 3.27  | 4.80  | 6.36   | 4.81   |
| L-Serine        | g  | 2.01  | 4.30  | 3.43   | 3.25   |
| Taurine         | mg | 70.00 | 63.00 | 344.00 | 159.00 |
| L-Threonine     | g  | 3.13  | 4.80  | 3.29   | 3.74   |
| L-Tryptophan    | g  | 0.97  | 1.30  | 1.36   | 1.21   |
| L-Tyrosine      | g  | 4.58  | 6.00  | 5.93   | 5.50   |
| L-Valine        | g  | 3.61  | 4.30  | 4.36   | 4.09   |
| L-Carnitine     | mg | 45.00 | 56.00 | 46.00  | 49.00  |

| Content per 100 g      | Unit    | MEDIFOOD | MAMOXI  | NUTRICIA | MEAN OF 3 L-AAs PS |
|------------------------|---------|----------|---------|----------|--------------------|
| Vitamin A              | µg RE   | 0.00     | 877.00  | 1020.00  | 632.33             |
| Vitamin C              | mg      | 0.00     | 81.00   | 131.00   | 70.67              |
| Vitamin D              | µg      | 0.00     | 31.00   | 28.60    | 19.87              |
| Vitamin E              | mg α-TE | 0.00     | 22.00   | 11.40    | 11.13              |
| Vitamin K              | µg      | 0.00     | 81.00   | 88.90    | 56.63              |
| Vitamin B1. Thiamin    | mg      | 0.00     | 2.00    | 1.52     | 1.17               |
| Vitamin B2. Riboflavin | mg      | 0.00     | 3.00    | 1.80     | 1.60               |
| Vitamin B3. Niacin     | mg      | 0.00     | 26.00   | 25.40    | 17.13              |
| Niacin (NE)            | mg      | 0.00     | 48.00   | ND       | 24.00              |
| Vitamin B6             | mg      | 0.00     | 2.00    | 2.06     | 1.35               |
| Total folate           | µg      | 0.00     | 157.00  | 359.00   | 172.00             |
| Vitamin B12            | µg      | 0.00     | 6.00    | 6.43     | 4.14               |
| Pantotenic acid        | mg      | 0.00     | 6.00    | 7.13     | 4.38               |
| Biotin                 | µg      | 0.00     | 31.00   | 191.00   | 74.00              |
| Choline                | mg      | 0.00     | 157.00  | 545.00   | 234.00             |
| Calcium                | mg      | 0.00     | 1960.00 | 1320     | 1093.33            |

|              |    |      |        |         |        |
|--------------|----|------|--------|---------|--------|
| Chromium     | µg | 0.00 | 63.00  | 38.00   | 33.67  |
| Copper       | mg | 0.00 | 2.60   | 1.90    | 1.50   |
| Iodine       | µg | 0.00 | 313.00 | 209.00  | 174.00 |
| Iron         | mg | 0.00 | 28.00  | 18.90   | 15.63  |
| Magnesium    | mg | 0.00 | 313.00 | 382.00  | 231.67 |
| Manganese    | mg | 0.00 | 6.00   | 1.90    | 2.63   |
| Molybdenum   | µg | 0.00 | 138.00 | 89.40   | 75.80  |
| Phosphorus   | mg | 0.00 | 833.00 | 1000.00 | 611.00 |
| Selenium     | µg | 0.00 | 75.00  | 95.50   | 56.83  |
| Zinc         | mg | 0.00 | 23.00  | 13.90   | 12.30  |
| Potassium    | mg | 0.00 | 0.00   | 358.00  | 119.33 |
| Sodium       | mg | 0.00 | 0.00   | <60     | 0.00*  |
| Chloride     | mg | 0.00 | 0.00   | <50     | 0.00*  |
| Fluoride     | mg | 0.00 | 1.00   | ND      | 0.50   |
| Myo-inositol | mg | 0.00 | 294.00 | ND      | 147.00 |
| Salt         | g  | 0.48 | 0.00   | <0.15   | 0.24*  |

**Explanation of L-AAs protein substitutes – powdered.**

MEDIFOOD AFENIL BUDDY. Recommended serving of 22 g.

MAMOXI XPHE SMART K. Recommended serving of 8 g.

NUTRICIA PKU LOPHLEX NEUTRAL. Recommended serving of 28 g.

\*Mean calculated on two or one product due to lack of data.
